# Supplementary material for: Minimal shoes improve stability and mobility in persons with a history of falls
Source: PubMed Central journal article supplement (PMC7730448; doi:10.1038/s41598-020-78862-6), 2020-12-10
Supplement: 41598_2020_78862_MOESM1_ESM.pdf [file 41598_2020_78862_MOESM1_ESM.pdf]

## Minimal shoes improve stability and mobility in persons with a history of falls.

Tomasz Cudejko <sup>1</sup>, James Gardiner <sup>1</sup>, Asangaedem Akpan <sup>1,2</sup>, Kristiaan D'Août <sup>1</sup>

<sup>1</sup> Department of Musculoskeletal and Ageing Science, Institute of Life Course and Medical Sciences, University of Liverpool, Liverpool, United Kingdom;

<sup>2</sup> Department of Medicine for Older People & Stroke, Liverpool University Hospitals NHS Foundation Trust, Liverpool, United Kingdom

Supplementary Table S1. Mean values (SD) for the CoP metrics of postural stability according to the footwear and visual conditions (n=30)

|                    | Conventional | Minimal    | Barefoot   |
|--------------------|--------------|------------|------------|
| <b>Eyes open</b>   |              |            |            |
| AP velocity (mm/s) | 13.4 (4.7)   | 9.7 (2.7)  | 9.0 (2.4)  |
| AP max range (mm)  | 3.5 (1.2)    | 2.7 (1.1)  | 2.7 (1.0)  |
| ML velocity (mm/s) | 9.1 (4.3)    | 5.6 (1.9)  | 6.1 (2.4)  |
| ML max range (mm)  | 2.4 (1.0)    | 1.6 (0.6)  | 1.7 (0.7)  |
| <b>Eyes closed</b> |              |            |            |
| AP velocity (mm/s) | 18.8 (8.4)   | 13.2 (3.9) | 11.9 (3.5) |
| AP max range (mm)  | 4.0 (1.6)    | 3.1 (0.9)  | 2.9 (1.0)  |
| ML velocity (mm/s) | 11.7 (7.1)   | 6.4 (2.5)  | 6.3 (3.2)  |
| ML max range (mm)  | 2.6 (1.4)    | 1.7 (0.8)  | 1.6 (1.0)  |

Lower values are indicative of better postural stability; Abbreviations: AP – anterior-posterior, ML – medial-lateral; mm/s – millimetres/second; max – maximum;

Supplementary Table S2. Mean values (SD) for the spatio-temporal parameters according to the footwear and walking conditions (n=28)

|                          | Conventional | Minimal     | Barefoot    |
|--------------------------|--------------|-------------|-------------|
| <b>Normal walking</b>    |              |             |             |
| Stance time (s)          | 0.53 (0.03)  | 0.54 (0.03) | 0.54 (0.05) |
| Swing time (s)           | 0.46 (0.03)  | 0.45 (0.02) | 0.44 (0.03) |
| Stride length (m)        | 1.44 (0.10)  | 1.40 (0.09) | 1.35 (0.10) |
| Step length (m)          | 0.72 (0.04)  | 0.70 (0.03) | 0.68 (0.04) |
| Cadence (steps/min.)     | 83.1 (5.68)  | 85.2 (4.87) | 88.8 (5.68) |
| <b>Dual-task walking</b> |              |             |             |
| Stance time (s)          | 0.54 (0.06)  | 0.56 (0.06) | 0.55 (0.08) |
| Swing time (s)           | 0.47 (0.03)  | 0.44 (0.03) | 0.44 (0.03) |
| Stride length (m)        | 1.43 (0.10)  | 1.37 (0.10) | 1.32 (0.10) |
| Step length (m)          | 0.71 (0.04)  | 0.69 (0.04) | 0.66 (0.04) |
| Cadence (steps/min.)     | 84.1 (6.10)  | 86.5 (6.30) | 91.8 (5.95) |

Abbreviations: s – seconds; m – meters, steps/min.– steps per minute

Supplementary Table S3. Means (SDs) for the TUG test (n=30) and the SEB test (n=25) according to the footwear

|              | SEBT (cm)  |             |            |             | TUGT (sec)  |
|--------------|------------|-------------|------------|-------------|-------------|
|              | Anterior   | Posterior   | Lateral    | Medial      |             |
| Conventional | 36.6 (8.3) | 26.6 (10.0) | 49.8 (9.1) | 30.7 (10.7) | 7.92 (1.41) |
| Minimal      | 37.8 (7.1) | 30.8 (9.8)  | 52.4 (8.4) | 34.2 (10.0) | 7.62 (1.26) |
| Barefoot     | 36.7 (7.0) | 26.5 (9.1)  | 49.6 (9.5) | 32.2 (9.5)  | 7.96 (1.26) |

Higher values of the SEB test and lower values of the TUG test are indicative of better mobility; Abbreviations: SEBT – Star Excursion Balance test, TUGT – Timed up and Go test;

Supplementary Table S4. Means (SDs) for the perceptions according to the shoes (n=30)

| <b>Outcome</b>                   | <b>Conventional</b> | <b>Minimal</b>           |
|----------------------------------|---------------------|--------------------------|
| Attractiveness (mm)              | 53.2 (29.7)         | 60.2 (21.6)              |
| Attractiveness for others (mm)   | 51.9 (26.1)         | 54.9 (21.5)              |
| Comfort (mm)                     | 71.2 (24.3)         | 71.0 (23.0)              |
| Fit (mm)                         | 68.7 (24.8)         | 84.8 (10.1) <sup>1</sup> |
| Ease of donning and doffing (mm) | 65.6 (27.9)         | 68.0 (23.5)              |
| Weight (mm)                      | 19.4 (14.6)         | 10.3 (7.2) <sup>1</sup>  |
| Stability (mm)                   | 65.4 (27.6)         | 86.8 (9.4) <sup>1</sup>  |

Values are in millimetres on 100-mm visual analogue scales. Higher scores represent greater perceived attractiveness, attractiveness for others, comfort, fit, ease of donning and doffing, weight and stability; <sup>1</sup> Significantly different from conventional shoes;

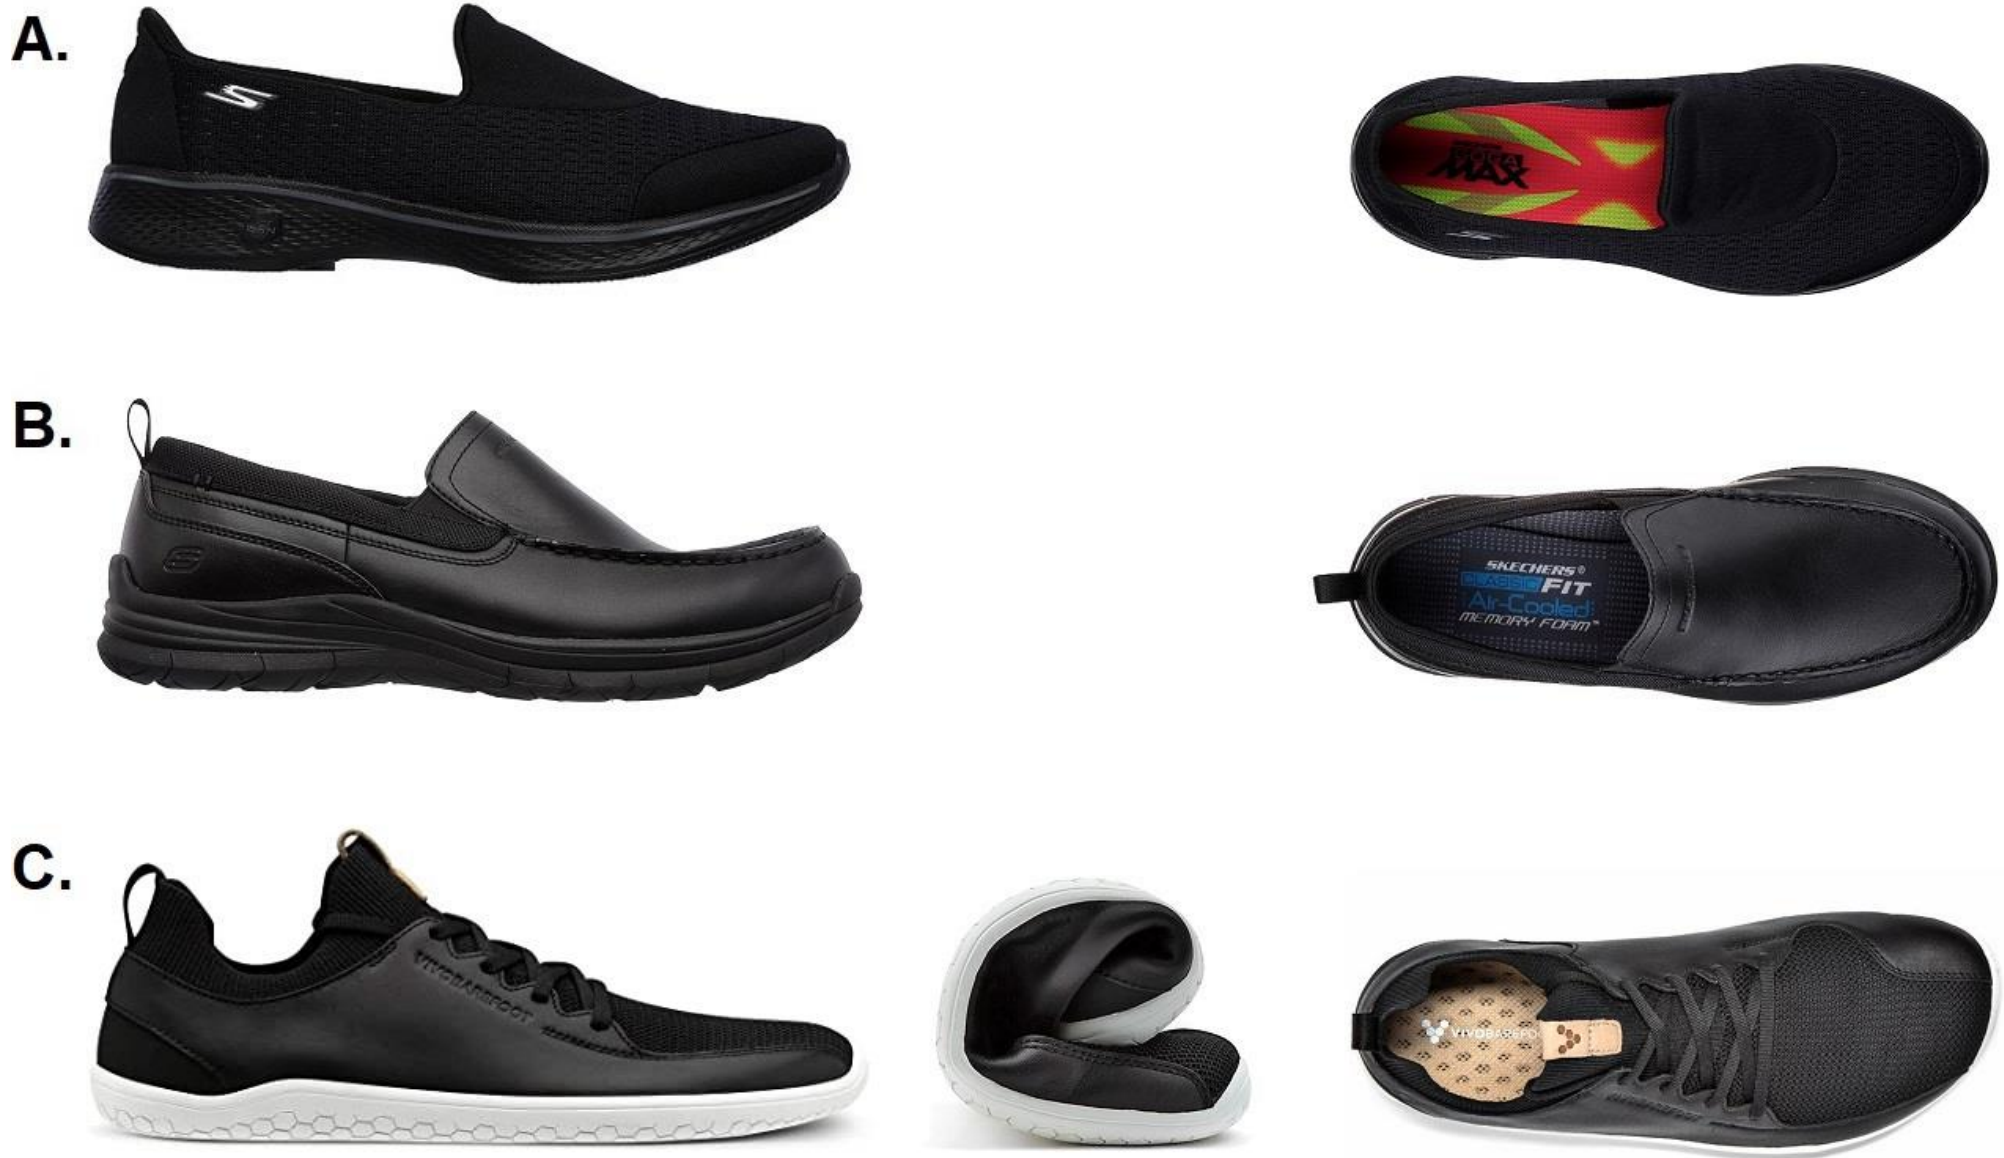

Supplementary Figure S1. A: a female conventional shoe (Go Walk 4.0-Pursuit, Skechers USA, Inc.); B: a male conventional shoe (Superior 2.0-Jeveno, Skechers USA, Inc.); C: a minimal shoe (Primus Knit, Vivobarefoot Ltd., London, UK).

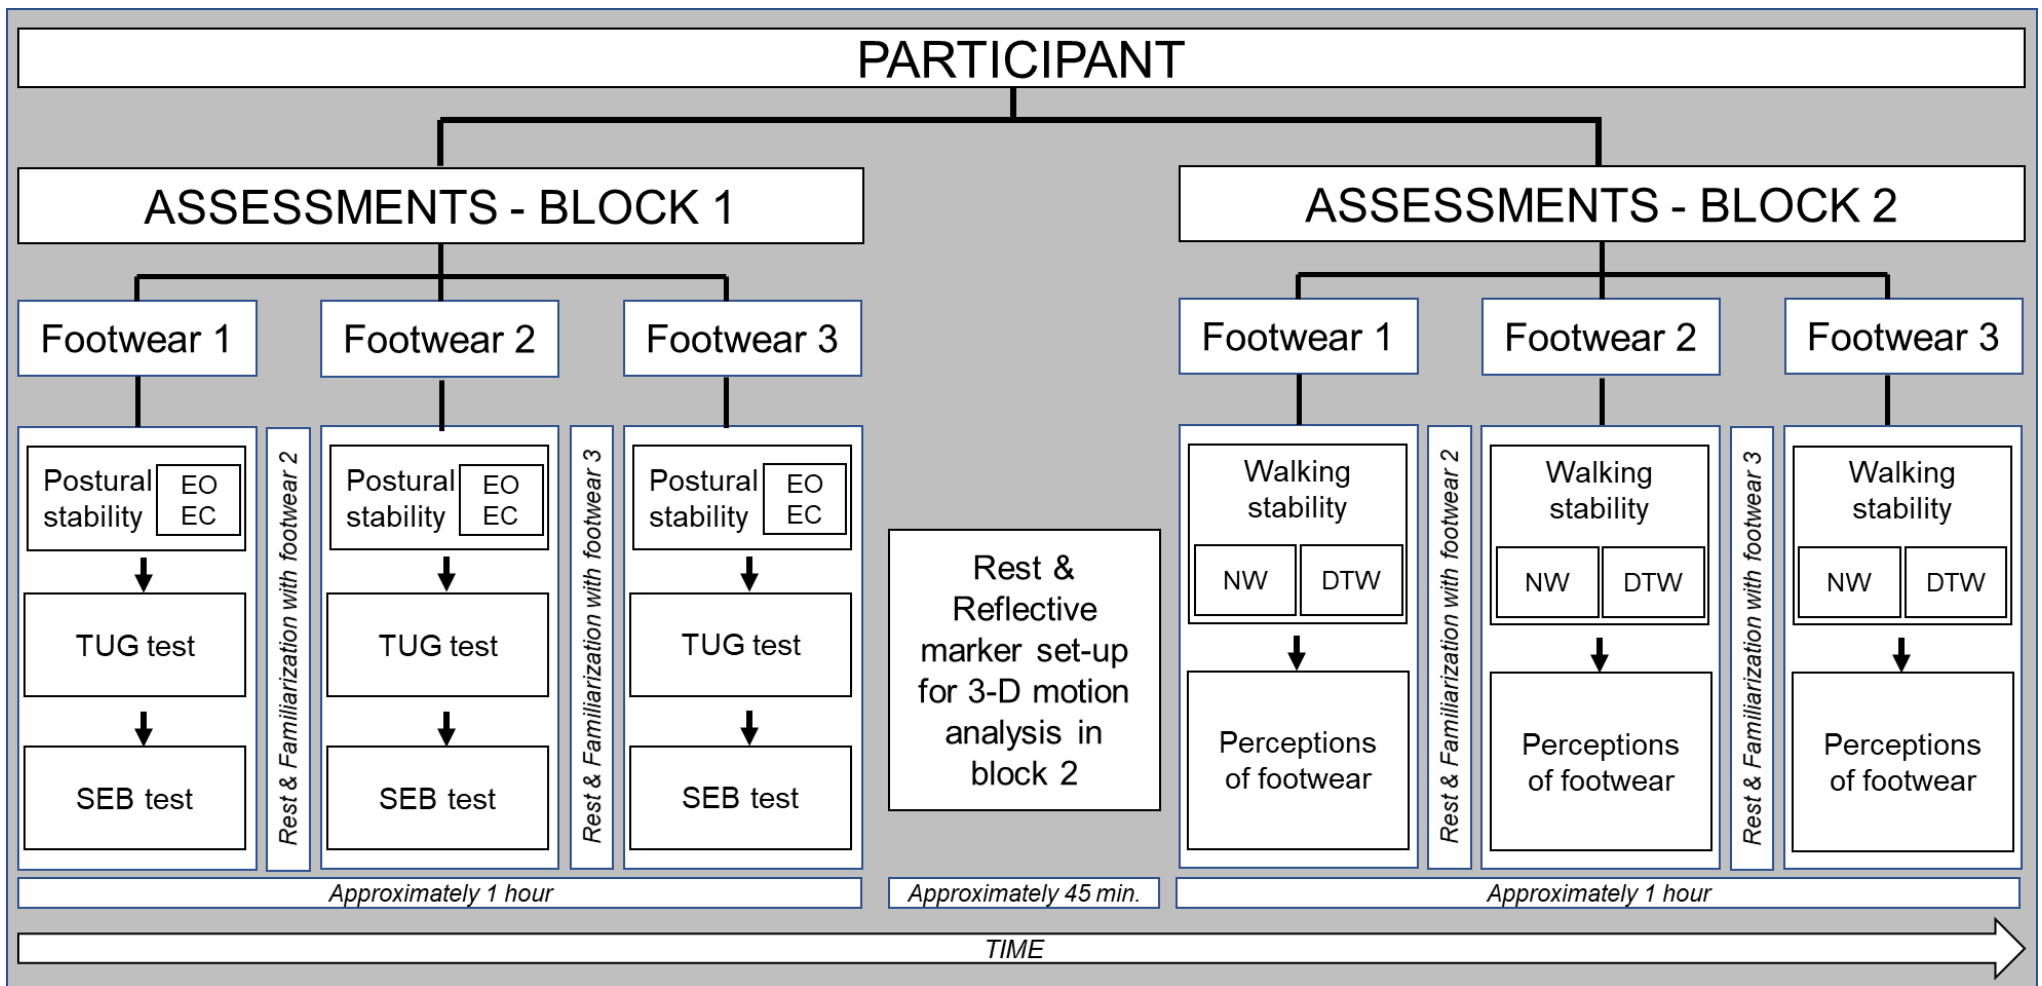

Supplementary Figure S2. Schematic overview of the study protocol per participant; Abbreviations: EO – Eyes open, EC – Eyes closed, TUG – Timed Up and Go test, SEB – Star Excursion Balance test, 3-D – Three-dimensional, NW – Normal walking, DTW – Dual-task walking
